# Supplementary material for: Comprehensive comparison of neonate and adult human platelet transcriptomes
Source: PLoS One. 2017 Aug 16;12(8):e0183042. doi: 10.1371/journal.pone.0183042 (PMC5559076; doi:10.1371/journal.pone.0183042)
Supplement: S2 Table — Coincident genes in all microarrays are marked in bold. (XLSX) [file pone.0183042.s004.xlsx]

## Sheet: S2 Table
	Table S2. The top 50 most expressed by Gnatenko, McRedmond and A+B microarrays and their rank in each array
	Array A+B		Gnatenko 2005		McRedmond 2004		Gnatenko 2003
	Gene Symbol	Rank	Gene Symbol	Rank	Gene Symbol	Rank	Gene Symbol	Rank
	SH3KBP1	1	B2M	1	CLU	1	TMSB4X	1
	ATP13A5	2	H3F3A	2	FTHP1	2	NRGN	2
	PPBP	3	PPBP	3	B2M	3	HBB	3
	LOC100131754	4	PF4	4	NRGN	4	CLU	4
	HBB	5	NRGN	5	TMSB4X	5	FTHP1	5
	DCAF6	6	ACTB	6	OAZ1	6	OAZ1	6
	TMSB4X	7	PTPRO	7	TAGLN2	7	GNAS1	7
	PF4	8	FTH1	8	PF4	8	PF4	8
	B2M	9	TMSB4X	9	HBB	9	B2M	9
	HBA1/2	10	FTHL5	10	ACTB	10	ACTB	10
	FTH1	11	HBB	11	FTH1	11	TAGLN2	11
	H3F3A	12	NCOA4	12	GPXI	12	FTL	12
	OST4	13	GNAS	13	SPARC	13	GPIIB	13
	FTHL5	14	HBA1/2	14	HLA-C	14	CCL5	14
	TUBB1	15	HIST1H2AC	15	TLN1	15	GPX1	15
	NRGN	16	RPL41	16	GNAS	16	HBA1/2	16
	GPX1	17	NGFRAP1	17	F13A1	17	MYL6	17
	NCOA4	18	CFL1	18	H3F2A	18	FTH1	18
	OAZ1	19	FTL	19	HBA1/2	19	SPARC	19
	HIST1H2AC	20	GPX1	20	MLH3	20	GNAS	20
	ACTB	21	RGS10	21	PPBP	21	HLA-C	21
	RGS18	22	CCL5	22	H2AL	22	PPBP	22
	PTPRO	23	GP1BB	23	YWHAH	23	GAPD	23
	C21orf7	24	HLA-C	24	GPIBB	24	MLM3	24
	VCL	25	UBC	25	NCOA4	25	NCOA4	25
	GNAS	26	SH3BGRL3	26	HLA-E	26	H2AFL	26
	CCL5	27	HIST1H2BK	27	CTSA	27	H3F3A	27
	ITGB1	28	TMEM111	28	PGRMC1	28	RPL41	28
	MMD	29	C21orf7	29	CFL1	29	TUBA1	29
	F13A1	30	PNN	30	MYL9	30	TLN1	30
	GNG11	31	HIST1H3H	31	TUBA1	31	PGRMC1	31
	PRKAR2B	32	UBB	32	MYL6	32	MIC2	32
	FTL	33	SERF2	33	CCL5	33	YWHAH	33
	MYL6	34	MMD	34	RPL41	34	TOP3B	34
	LUZP6	35	OAZ1	35	ITGA2B	35	Unknown	35
	HIST1H2BK	36	GNG11	36	H2B/H2A	36	UBC	36
	RGS10	37	MLH3	37	HERV RTVL-H neutral protease	37	H2AFQ	37
	RPL41	38	SPARC	38	FTLL1	38	MLCB	38
	SPARC	39	TAGLN2	39	MIC2	39	F13A1	39
	SERF2	40	HLA-A	40	FLNA	40	Unknown	40
	LIMS1	41	HLA-B	41	VCL	41	FLNA	41
	UBB	42	TPT1	42	H2BE	42	HLA-E	42
	PNN	43	MYL6	43	PTMA	43	PKM2	43
	HLA-E	44	RAB11A	44	H2AE	44	PTMA	44
	HLA-C	45	VCL	45	DYNLL1	45	RGS10	45
	MFSD1	46	F13A1	46	HLA-A	46	Unknown	46
	TAGLN2	47	HIST2H2BE	47	Weakly similar to histone H3.2	47	FL1	47
	GP1BB	48	ARHGDIB	48	ARPC1B	48	ITGA2B	48
	NT5C3	49	DYNLL1	49	UBC	49	H2BFE	49
	SRGN	50	CD99	50	MMD	50	H2AFO	50
	Coincident genes among all microarrays are marked in bold.
